# Supplementary material for: Photochemically-Induced Release of Lysosomal Sequestered Sunitinib: Obstacles for Therapeutic Efficacy
Source: PubMed Central journal article supplement (PMC7072415; doi:10.3390/cancers12020417), 2020-02-11
Supplement: cancers-12-00417-s001.pdf [file cancers-12-00417-s001.pdf]

## Supplementary Materials: Photochemical-Induced Release of Lysosomal Sequestered Sunitinib: Obstacles for Therapeutic Efficacy

Judith Jing Wen Wong, Maria Brandal Berstad, Ane Sofie Viset Fremstedal, Kristian Berg, Sebastian Patzke, Vigdis Sørensen, Qian Peng, Pål Kristian Selbo and Anette Weyergang

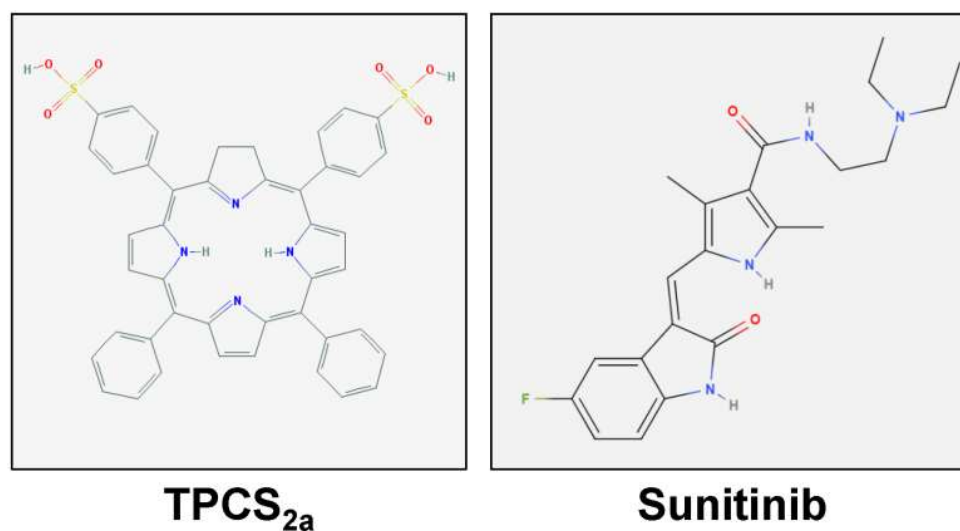

**Figure S1.** Chemical structure of disulfonated tetraphenyl chlorin (TPCS<sub>2a</sub>) and sunitinib.

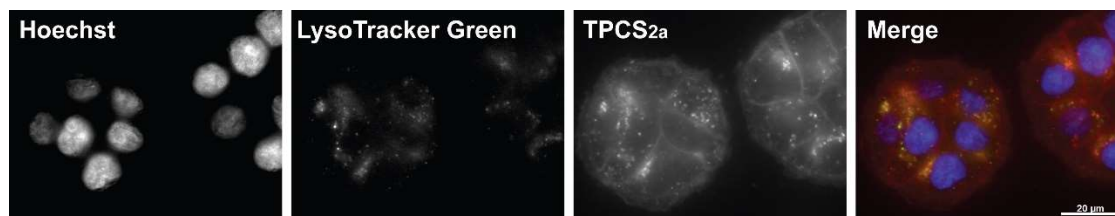

**Figure S2.** TPCS<sub>2a</sub> localization after 18 h incubation without wash. Representative live cell fluorescence imaging of TPCS<sub>2a</sub> in HT-29 cells after 18 h incubation with 0.4 μg/mL TPCS<sub>2a</sub> without wash and chase. TPCS<sub>2a</sub> (red), LysoTracker Green (green), Hoechst 33342 (blue). Co-localization indicated in yellow. Scale bar: 20 μm.

| Sample             | Fluorescence (a.u.) |               |
|--------------------|---------------------|---------------|
|                    | Alone               | Combined      |
| Sunitinib          | 199.33 ± 11.08      | 106.55 ± 6.57 |
| TPCS <sub>2a</sub> | 570.16 ± 6.51       | 460 ± 7.54    |

**Figure S3.** Signals from fluorescence spectroscopy of sunitinib, TPCS<sub>2a</sub> or the combination at pH-7 (PBS containing 1% FBS). Fluorescence detected in sunitinib, TPCS<sub>2a</sub> or the combination without light exposure. Data are mean of three experiments ± S.E.

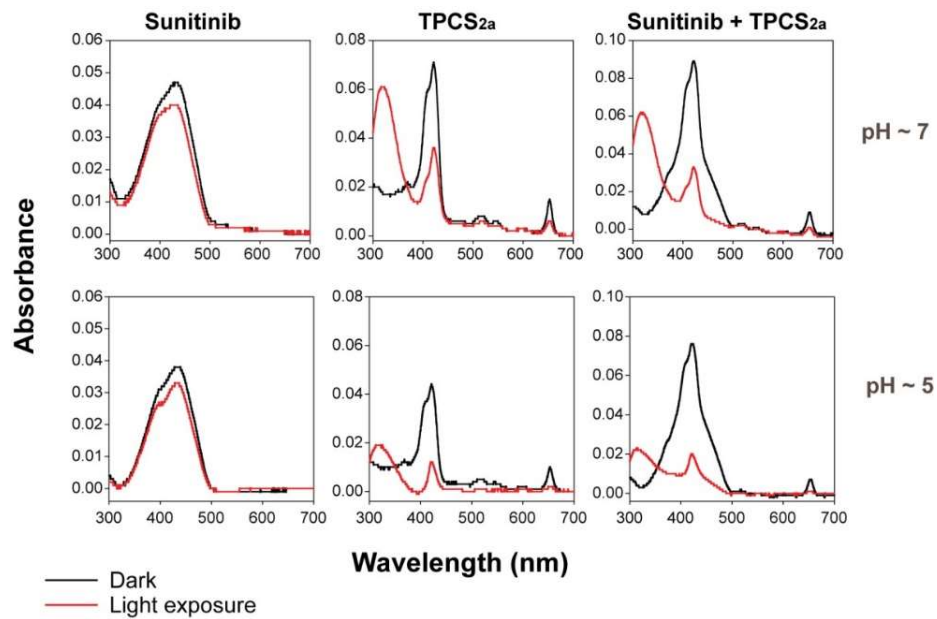

**Figure S4.** Absorbance spectra of sunitinib and TPCS<sub>2a</sub>. Representative absorbance spectra of sunitinib alone, TPCS<sub>2a</sub> and the combination before and after blue light exposure at pH 7 and 5.

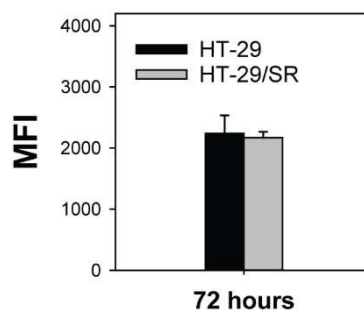

**Figure S5.** Sunitinib accumulation in HT-29 and HT-29/SR after 72 h incubation. Median sunitinib fluorescence intensities in live and single cells. Cells were subjected to a 24 h wash before incubation with sunitinib. (Mean of three experiments  $\pm$  S.E.).

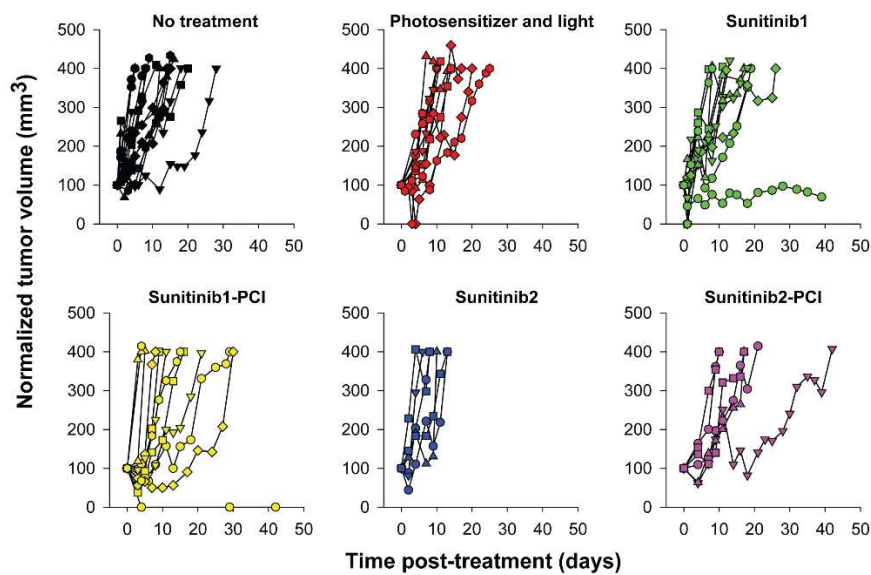

**Figure S6.** Tumor growth curves for HT-29 xenografts in athymic Nude-Foxn1<sup>nu</sup> mice.

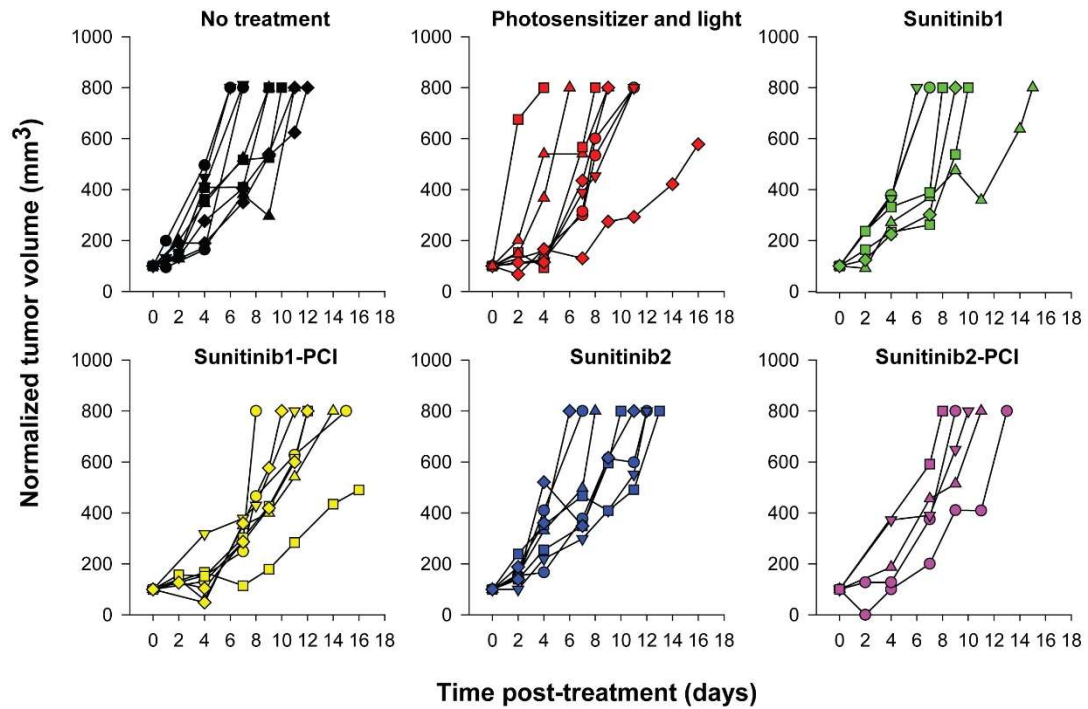

**Figure S7.** Tumor growth curves for CT26.WT allografts in BALB/c mice.

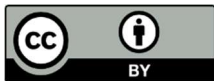

© 2020 by the authors. Licensee MDPI, Basel, Switzerland. This article is an open access article distributed under the terms and conditions of the Creative Commons Attribution (CC BY) license (<http://creativecommons.org/licenses/by/4.0/>).
